# Supplementary material for: Computational insights on the antioxidant, antinitrosant, and xanthine oxidase inhibitory capacities of neobavaisoflavone
Source: Royal Society of Chemistry journal article supplement (doi:10.1039/d3nj03068g), 2023-01-01
Supplement: d3nj03068g1.pdf [file d3nj03068g1.pdf]

# Computational insights on the antioxidant, antinitrosant, and Xanthine Oxidase inhibitory capacities of neobavaisoflavone

Housseem Boulebd<sup>1,\*</sup>, Imene Amine Khodja<sup>1</sup>, Miguel Carmena-Bargueño<sup>2</sup>, Horacio  
Pérez-Sánchez<sup>2</sup>

<sup>1</sup>*Department of Chemistry, Faculty of Exact Science, University of Constantine 1, Constantine, 25000, Algeria.*

<sup>2</sup>*Structural Bioinformatics and High-Performance Computing Research Group (BIO-HPC), Computer Engineering Department, Universidad Católica de Murcia (UCAM), Campus de los Jerónimos 135, 30107 Guadalupe, Spain*

\*Corresponding author: [boulebd.housseem@umc.edu.dz](mailto:boulebd.housseem@umc.edu.dz)

| Table of Contents                                                                                                                                                                | Page    |
|----------------------------------------------------------------------------------------------------------------------------------------------------------------------------------|---------|
| <b>Figure S1.</b> Distribution of spin density of the radical products of <b>Neo</b> .                                                                                           | S2      |
| <b>Table S1.</b> Selected atom in molecule (AIM) parameters of the <b>Neo</b> -17CH and 14OH + HOO transition states in the lipid-like environment.                              | S3      |
| <b>Table S2.</b> The cartesian coordinates and energies of <b>Neo</b> and its radical and anionic states calculated at M06-2X/6-311++G(d,p) level in water and pentyl ethanoate. | S4-S13  |
| <b>Table S3.</b> The cartesian coordinates and energies of the TSs of the reaction between <b>Neo</b> and HOO• and NO <sub>2</sub> calculated at M06-2X/6-311++G(d,p) level.     | S14-S20 |
| <b>Table S4.</b> The method to calculate rate constant following the conventional transition state theory                                                                        | S21-S22 |
| <b>References</b>                                                                                                                                                                | S22-S23 |

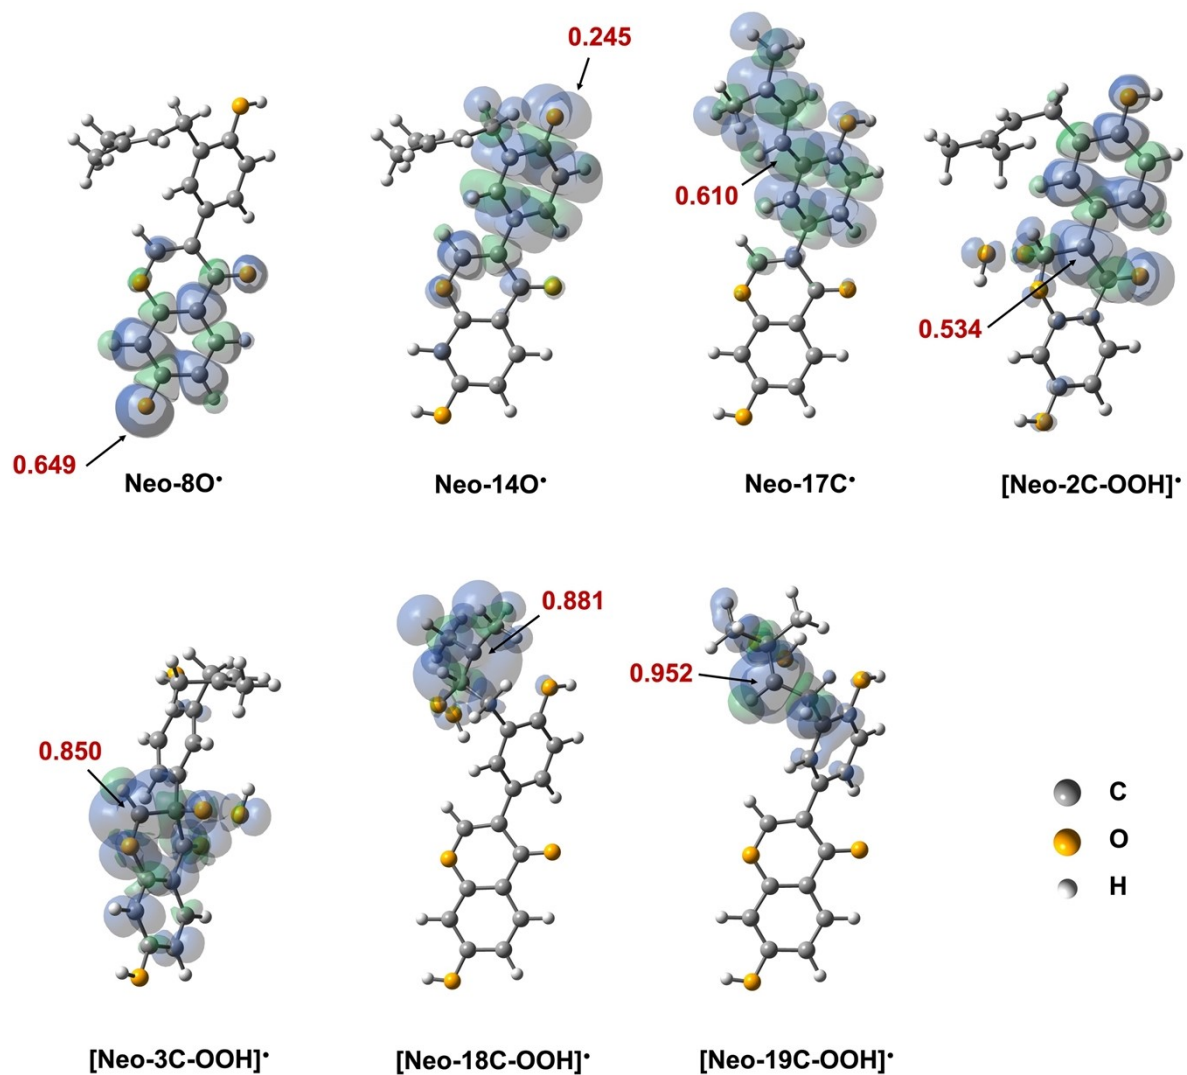

**Figure S1.** Distribution of spin density of the radical products of Neo.

**Table S1.** Selected atom in molecule (AIM) parameters of the **Neo-17CH** and **14OH + HOO** transition states in the lipid-like environment.

| Contacts                                                                                                                                                      | $\rho(r)$ (au) | $\nabla^2\rho(r)$ (au) | $G(r)^a$ (au) | $V(r)^b$ (au) | $G(r)/ V(r) $ (au) | $H(r)^c$ | $E_{HB}^d$ (kcal/mol) |
|---------------------------------------------------------------------------------------------------------------------------------------------------------------|----------------|------------------------|---------------|---------------|--------------------|----------|-----------------------|
| <b>Neo-14O...H...OOH</b>                                                                                                                                      |                |                        |               |               |                    |          |                       |
| H42...O24                                                                                                                                                     | 0.2293         | -0.8554                | 0.0917        | -0.3974       | -0.2307            | -0.3057  | -125.2                |
| H42...O43                                                                                                                                                     | 0.1332         | -0.0229                | 0.0871        | -0.1667       | -0.5225            | -0.0796  | -52.5                 |
| O44...C16                                                                                                                                                     | 0.0155         | 0.0508                 | 0.0116        | -0.0105       | -1.1048            | 0.0011   | -3.3                  |
| RCP1<br>(C16-O24-<br>H42-O43-<br>O44)                                                                                                                         | 0.0141         | 0.0665                 | 0.0149        | -0.0132       | -1.1288            | 0.0017   | -4.2                  |
| RCP1<br>(C16-C15-<br>C19-H33-<br>O43-O44)                                                                                                                     | 0.0071         | 0.0303                 | 0.0066        | -0.0056       | -1.1786            | 0.0010   | -1.8                  |
| <b>Neo-17C...H...OOH</b>                                                                                                                                      |                |                        |               |               |                    |          |                       |
| C8...H14                                                                                                                                                      | 0.1772         | -0.3522                | 0.0387        | -0.1654       | -0.2340            | -0.1267  | -52.1                 |
| H14...O42                                                                                                                                                     | 0.1345         | -0.0431                | 0.0841        | -0.1574       | -0.5343            | -0.0733  | -49.6                 |
| H44...O7                                                                                                                                                      | 0.0182         | 0.0678                 | 0.0155        | -0.0141       | -1.0993            | 0.0014   | -4.4                  |
| RCP1<br>(C1-C6-C8-<br>H14-O42-<br>O43-H44-O7)                                                                                                                 | 0.0076         | 0.0304                 | 0.0065        | -0.0055       | -1.1818            | 0.0010   | -1.7                  |
| (a) Electron kinetic energy density, (b) Electron potential energy density, (C) Total electron energy density, (d) Individual energies of each hydrogen bond. |                |                        |               |               |                    |          |                       |

**Table S2.** The cartesian coordinates and energies of **Neo** and its radical and anionic states calculated at M06-2X/6-311++G(d,p) level in water and pentyl ethanoate.

| Neo (W)               |             |             |             |                                                   |
|-----------------------|-------------|-------------|-------------|---------------------------------------------------|
| Cartesian Coordinates |             |             |             | Frequency and Energy                              |
| C                     | -5.35297100 | -0.55772800 | 0.66643500  | Zero-point Energy Correction = 0.335739 Hartree   |
| C                     | -5.42878700 | 0.69227400  | 0.02362300  | Thermal Correction to Energy = 0.357072 Hartree   |
| C                     | -4.29846800 | 1.29345500  | -0.50264500 | Thermal Correction to Enthalpy = 0.358016 Hartree |
| C                     | -3.08266400 | 0.62698600  | -0.38107700 | Thermal Correction to Free Energy = 0.284505      |
| C                     | -2.96937300 | -0.61358100 | 0.24639100  | Hartree                                           |
| C                     | -4.13914100 | -1.19210500 | 0.77230500  | EE + Zero-point Energy = -1073.4001 Hartree       |
| O                     | -1.99387200 | 1.25382700  | -0.91184900 | EE + Thermal Energy Correction = -1073.3787       |
| C                     | -0.79271000 | 0.65128200  | -0.83573400 | Hartree                                           |
| C                     | -0.55230600 | -0.54187700 | -0.25233500 | EE + Thermal Enthalpy Correction = -1073.3778     |
| C                     | -1.66663200 | -1.27128500 | 0.35695300  | Hartree                                           |
| O                     | -6.65577000 | 1.26886300  | -0.05049500 | EE + Thermal Free Energy Correction = -1073.4513  |
| O                     | -1.52531900 | -2.35167800 | 0.93437200  | Hartree                                           |
| C                     | 0.82905600  | -1.07545400 | -0.21506000 |                                                   |
| C                     | 1.89492400  | -0.24479800 | 0.14943400  |                                                   |
| C                     | 3.21175100  | -0.69236800 | 0.15874700  |                                                   |
| C                     | 3.44841800  | -2.02354800 | -0.20820500 |                                                   |
| C                     | 2.40442300  | -2.87041400 | -0.56591100 |                                                   |
| C                     | 1.09788000  | -2.39803500 | -0.56934800 |                                                   |
| C                     | 4.39611600  | 0.18275300  | 0.52752800  |                                                   |
| C                     | 4.05580600  | 1.55681600  | 1.04443800  |                                                   |
| C                     | 3.66293800  | 2.59242600  | 0.29671000  |                                                   |
| C                     | 3.34319000  | 3.92976100  | 0.90528200  |                                                   |
| C                     | 3.46510000  | 2.51147400  | -1.19152300 |                                                   |
| O                     | 4.75131900  | -2.45027500 | -0.19668500 |                                                   |
| H                     | -6.25807300 | -0.99695200 | 1.06708500  |                                                   |
| H                     | -4.34680700 | 2.25607700  | -0.99800700 |                                                   |
| H                     | -4.06441800 | -2.15415100 | 1.26446400  |                                                   |
| H                     | -0.02505400 | 1.24853100  | -1.31269500 |                                                   |
| H                     | -6.60464300 | 2.11671000  | -0.51199600 |                                                   |
| H                     | 1.68880500  | 0.77848600  | 0.44439600  |                                                   |
| H                     | 2.62387100  | -3.89562100 | -0.84604800 |                                                   |
| H                     | 0.29117900  | -3.05839300 | -0.86329000 |                                                   |
| H                     | 4.98798200  | -0.34618700 | 1.27902700  |                                                   |
| H                     | 5.04258200  | 0.25538100  | -0.35439300 |                                                   |
| H                     | 4.13240800  | 1.70146600  | 2.11959600  |                                                   |
| H                     | 3.48197100  | 3.92483000  | 1.98750200  |                                                   |
| H                     | 3.97973300  | 4.70895600  | 0.47401400  |                                                   |
| H                     | 2.30796500  | 4.21099500  | 0.68598300  |                                                   |
| H                     | 3.78469900  | 1.55843100  | -1.61381500 |                                                   |
| H                     | 2.40459200  | 2.65107100  | -1.43065100 |                                                   |
| H                     | 4.00952900  | 3.31751600  | -1.69322900 |                                                   |

|                       |             |             |             |                                                   |
|-----------------------|-------------|-------------|-------------|---------------------------------------------------|
| H                     | 4.79350800  | -3.37923900 | -0.45673500 |                                                   |
| Neo (PE)              |             |             |             |                                                   |
| Cartesian Coordinates |             |             |             | Frequency and Energy                              |
| C                     | -5.38904700 | -0.51542500 | 0.63249800  | Zero-point Energy Correction = 0.336072 Hartree   |
| C                     | -5.43944100 | 0.75606800  | 0.03269600  | Thermal Correction to Energy = 0.35763 Hartree    |
| C                     | -4.29394700 | 1.35090600  | -0.46874800 | Thermal Correction to Enthalpy = 0.358574 Hartree |
| C                     | -3.08858900 | 0.65842500  | -0.36594200 | Thermal Correction to Free Energy = 0.283881      |
| C                     | -3.00473600 | -0.60310300 | 0.21908800  | Hartree                                           |
| C                     | -4.18677100 | -1.17547900 | 0.71917500  | EE + Zero-point Energy = -1073.4004 Hartree       |
| O                     | -1.99125600 | 1.27876500  | -0.87288100 | EE + Thermal Energy Correction = -1073.3788       |
| C                     | -0.80045200 | 0.65482400  | -0.80246000 | Hartree                                           |
| C                     | -0.57516200 | -0.55400400 | -0.24994600 | EE + Thermal Enthalpy Correction = -1073.3779     |
| C                     | -1.71337900 | -1.30336300 | 0.31347800  | Hartree                                           |
| O                     | -6.65021000 | 1.35388400  | -0.02536400 | EE + Thermal Free Energy Correction = -1073.4526  |
| O                     | -1.60624300 | -2.40692700 | 0.82413600  | Hartree                                           |
| C                     | 0.80167800  | -1.09730400 | -0.20616900 |                                                   |
| C                     | 1.87770600  | -0.26859900 | 0.13633000  |                                                   |
| C                     | 3.19028500  | -0.72519300 | 0.15172300  |                                                   |
| C                     | 3.41813300  | -2.06575100 | -0.18633100 |                                                   |
| C                     | 2.36399200  | -2.91048500 | -0.51780800 |                                                   |
| C                     | 1.06037900  | -2.43035200 | -0.52497500 |                                                   |
| C                     | 4.38164100  | 0.14638900  | 0.50618800  |                                                   |
| C                     | 4.04823800  | 1.51768200  | 1.03263700  |                                                   |
| C                     | 3.75806800  | 2.59124200  | 0.29233600  |                                                   |
| C                     | 3.45530000  | 3.92458300  | 0.91998000  |                                                   |
| C                     | 3.68129100  | 2.57001700  | -1.20981000 |                                                   |
| O                     | 4.71097700  | -2.49508500 | -0.16917200 |                                                   |
| H                     | -6.30442500 | -0.94920300 | 1.01524800  |                                                   |
| H                     | -4.31351300 | 2.33065700  | -0.93299100 |                                                   |
| H                     | -4.12416000 | -2.15545800 | 1.17707800  |                                                   |
| H                     | -0.02203200 | 1.25180700  | -1.26179000 |                                                   |
| H                     | -6.57830500 | 2.21580600  | -0.45290700 |                                                   |
| H                     | 1.68507500  | 0.76071300  | 0.41951700  |                                                   |
| H                     | 2.56583400  | -3.94686300 | -0.77182400 |                                                   |
| H                     | 0.24630900  | -3.09513900 | -0.78301200 |                                                   |
| H                     | 4.97955800  | -0.38733100 | 1.24989900  |                                                   |
| H                     | 5.02290100  | 0.21865100  | -0.37869900 |                                                   |
| H                     | 4.04198400  | 1.62738100  | 2.11497200  |                                                   |
| H                     | 3.52538200  | 3.88534100  | 2.00818200  |                                                   |
| H                     | 4.15055400  | 4.68774400  | 0.55471200  |                                                   |
| H                     | 2.44850100  | 4.25930900  | 0.64814200  |                                                   |
| H                     | 3.86983000  | 1.58404200  | -1.63463100 |                                                   |
| H                     | 2.68713900  | 2.89533600  | -1.53603300 |                                                   |
| H                     | 4.39749600  | 3.27783100  | -1.64057300 |                                                   |
| H                     | 4.74460400  | -3.43218900 | -0.39266800 |                                                   |
| Neo-80* (W)           |             |             |             |                                                   |
| Cartesian Coordinates |             |             |             | Frequency and Energy                              |

|                       |             |             |             |                                                   |
|-----------------------|-------------|-------------|-------------|---------------------------------------------------|
| C                     | -5.40715900 | -0.54272700 | 0.65010500  | Zero-point Energy Correction = 0.321874 Hartree   |
| C                     | -5.51287400 | 0.76764400  | 0.02669400  | Thermal Correction to Energy = 0.343183 Hartree   |
| C                     | -4.31007900 | 1.37655700  | -0.49028900 | Thermal Correction to Enthalpy = 0.344127 Hartree |
| C                     | -3.11263100 | 0.70519400  | -0.38125000 | Thermal Correction to Free Energy = 0.269241      |
| C                     | -3.02673100 | -0.55793000 | 0.22049300  | Hartree                                           |
| C                     | -4.20480600 | -1.16662100 | 0.73673300  | EE + Zero-point Energy = -1072.7543 Hartree       |
| O                     | -2.00648100 | 1.32504700  | -0.88522400 | EE + Thermal Energy Correction = -1072.733        |
| C                     | -0.81951400 | 0.70170000  | -0.81027200 | Hartree                                           |
| C                     | -0.59855600 | -0.51017500 | -0.25109700 | EE + Thermal Enthalpy Correction = -1072.7321     |
| C                     | -1.72359800 | -1.23822600 | 0.32738700  | Hartree                                           |
| O                     | -6.61050100 | 1.35771000  | -0.06304900 | EE + Thermal Free Energy Correction = -1072.8069  |
| O                     | -1.62196400 | -2.33040800 | 0.88097000  | Hartree                                           |
| C                     | 0.77394000  | -1.06318200 | -0.21258100 |                                                   |
| C                     | 1.85132000  | -0.24790200 | 0.15399400  |                                                   |
| C                     | 3.16004800  | -0.71684600 | 0.16958000  |                                                   |
| C                     | 3.37661500  | -2.05282900 | -0.19418300 |                                                   |
| C                     | 2.32105200  | -2.88251900 | -0.55804600 |                                                   |
| C                     | 1.02245300  | -2.39000400 | -0.56640100 |                                                   |
| C                     | 4.35712000  | 0.13873000  | 0.54233900  |                                                   |
| C                     | 4.03858300  | 1.52329800  | 1.04490100  |                                                   |
| C                     | 3.66560000  | 2.55769700  | 0.28537000  |                                                   |
| C                     | 3.36753600  | 3.90669400  | 0.87894100  |                                                   |
| C                     | 3.47116200  | 2.46456200  | -1.20260400 |                                                   |
| O                     | 4.67101900  | -2.50112900 | -0.17304800 |                                                   |
| H                     | -6.31602300 | -0.98865900 | 1.03509600  |                                                   |
| H                     | -4.36394400 | 2.35256900  | -0.95693300 |                                                   |
| H                     | -4.10997900 | -2.14145700 | 1.19832700  |                                                   |
| H                     | -0.03704300 | 1.29646400  | -1.26599700 |                                                   |
| H                     | 1.66096800  | 0.77890300  | 0.44731200  |                                                   |
| H                     | 2.52513300  | -3.91103500 | -0.83749800 |                                                   |
| H                     | 0.20721900  | -3.03783600 | -0.86413900 |                                                   |
| H                     | 4.93239800  | -0.39540900 | 1.30298900  |                                                   |
| H                     | 5.01221400  | 0.19187100  | -0.33459700 |                                                   |
| H                     | 4.11503100  | 1.67751300  | 2.11870200  |                                                   |
| H                     | 3.50203100  | 3.91035000  | 1.96170200  |                                                   |
| H                     | 4.01983400  | 4.66968100  | 0.44228200  |                                                   |
| H                     | 2.33846600  | 4.20429700  | 0.65246000  |                                                   |
| H                     | 3.77738800  | 1.50244000  | -1.61411800 |                                                   |
| H                     | 2.41370600  | 2.61808800  | -1.44672900 |                                                   |
| H                     | 4.02956500  | 3.25698400  | -1.71058800 |                                                   |
| H                     | 4.69956800  | -3.43320700 | -0.42433500 |                                                   |
| Neo-8O* (P)           |             |             |             |                                                   |
| Cartesian Coordinates |             |             |             | Frequency and Energy                              |
| C                     | -5.43730100 | -0.49404000 | 0.62889700  | Zero-point Energy Correction = 0.322429 Hartree   |
| C                     | -5.52077200 | 0.83646400  | 0.04114700  | Thermal Correction to Energy = 0.343814 Hartree   |
| C                     | -4.30165500 | 1.42928000  | -0.46073100 | Thermal Correction to Enthalpy = 0.344759 Hartree |
| C                     | -3.11760500 | 0.73126000  | -0.37329100 | Thermal Correction to Free Energy = 0.269574      |

|                       |             |             |             |                                                   |
|-----------------------|-------------|-------------|-------------|---------------------------------------------------|
| C                     | -3.05874500 | -0.55081300 | 0.19408400  | Hartree                                           |
| C                     | -4.24721600 | -1.14681400 | 0.69489600  | EE + Zero-point Energy = -1072.7585 Hartree       |
| O                     | -2.00215600 | 1.33549300  | -0.86489400 | EE + Thermal Energy Correction = -1072.7371       |
| C                     | -0.82568300 | 0.69051500  | -0.79438700 | Hartree                                           |
| C                     | -0.62001700 | -0.53120200 | -0.25682500 | EE + Thermal Enthalpy Correction = -1072.7361     |
| C                     | -1.76941100 | -1.27140800 | 0.28126700  | Hartree                                           |
| O                     | -6.60108200 | 1.44826100  | -0.03043000 | EE + Thermal Free Energy Correction = -1072.8113  |
| O                     | -1.69960800 | -2.38446900 | 0.77338200  | Hartree                                           |
| C                     | 0.74870200  | -1.09208200 | -0.20616200 |                                                   |
| C                     | 1.83185000  | -0.27450900 | 0.14201700  |                                                   |
| C                     | 3.13828500  | -0.74593500 | 0.16627000  |                                                   |
| C                     | 3.35272000  | -2.08986900 | -0.16959200 |                                                   |
| C                     | 2.29124000  | -2.92276100 | -0.50781200 |                                                   |
| C                     | 0.99330600  | -2.42831100 | -0.52308300 |                                                   |
| C                     | 4.33700300  | 0.11218300  | 0.52780400  |                                                   |
| C                     | 4.01637800  | 1.49281700  | 1.03773000  |                                                   |
| C                     | 3.74695800  | 2.56226200  | 0.28365600  |                                                   |
| C                     | 3.45720700  | 3.90624000  | 0.89446300  |                                                   |
| C                     | 3.68427000  | 2.52641200  | -1.21886300 |                                                   |
| O                     | 4.63940200  | -2.53312300 | -0.14305200 |                                                   |
| H                     | -6.35510500 | -0.93044900 | 1.00415000  |                                                   |
| H                     | -4.33695000 | 2.41844100  | -0.90129600 |                                                   |
| H                     | -4.16531100 | -2.13617600 | 1.12825500  |                                                   |
| H                     | -0.03354900 | 1.27998600  | -1.23980400 |                                                   |
| H                     | 1.64988500  | 0.75729600  | 0.42298500  |                                                   |
| H                     | 2.48273800  | -3.96130500 | -0.76048900 |                                                   |
| H                     | 0.17457200  | -3.08482600 | -0.78733200 |                                                   |
| H                     | 4.91849400  | -0.42325900 | 1.28324700  |                                                   |
| H                     | 4.98952700  | 0.16729300  | -0.35000500 |                                                   |
| H                     | 4.00286700  | 1.61394800  | 2.11875200  |                                                   |
| H                     | 3.51506900  | 3.87729400  | 1.98369300  |                                                   |
| H                     | 4.16775900  | 4.65500900  | 0.52894400  |                                                   |
| H                     | 2.45870800  | 4.25338400  | 0.60800800  |                                                   |
| H                     | 3.86385400  | 1.53381700  | -1.63203200 |                                                   |
| H                     | 2.69806300  | 2.86212800  | -1.55841800 |                                                   |
| H                     | 4.41409300  | 3.22019000  | -1.64951100 |                                                   |
| H                     | 4.66575700  | -3.47022300 | -0.36811700 |                                                   |
| Neo-14O* (W)          |             |             |             |                                                   |
| Cartesian Coordinates |             |             |             | Frequency and Energy                              |
| C                     | 5.36371900  | -0.55544600 | -0.48778300 | Zero-point Energy Correction = 0.322811 Hartree   |
| C                     | 5.38374500  | 0.76175400  | 0.00680500  | Thermal Correction to Energy = 0.343938 Hartree   |
| C                     | 4.21471200  | 1.39778700  | 0.39216300  | Thermal Correction to Enthalpy = 0.344882 Hartree |
| C                     | 3.02085800  | 0.69587200  | 0.27709300  | Thermal Correction to Free Energy = 0.271063      |
| C                     | 2.96111400  | -0.60990000 | -0.20702000 | Hartree                                           |
| C                     | 4.16716300  | -1.22260000 | -0.59150500 | EE + Zero-point Energy = -1072.7684 Hartree       |
| O                     | 1.88886800  | 1.35958300  | 0.66607900  | EE + Thermal Energy Correction = -1072.7472       |
| C                     | 0.70845700  | 0.73860400  | 0.59307900  | Hartree                                           |

|                       |             |             |             |                                                   |
|-----------------------|-------------|-------------|-------------|---------------------------------------------------|
| C                     | 0.51791400  | -0.52886300 | 0.14800400  | EE + Thermal Enthalpy Correction = -1072.7463     |
| C                     | 1.67675500  | -1.30091800 | -0.32119300 | Hartree                                           |
| O                     | 6.59434000  | 1.36791800  | 0.08575900  | EE + Thermal Free Energy Correction = -1072.8201  |
| O                     | 1.57939200  | -2.42969800 | -0.80045500 | Hartree                                           |
| C                     | -0.83613100 | -1.09125100 | 0.14126200  |                                                   |
| C                     | -1.94169300 | -0.27042500 | -0.18301600 |                                                   |
| C                     | -3.22945500 | -0.74081500 | -0.16121700 |                                                   |
| C                     | -3.46644200 | -2.13436600 | 0.21456500  |                                                   |
| C                     | -2.31785200 | -2.95380200 | 0.54045500  |                                                   |
| C                     | -1.05284000 | -2.44978600 | 0.49906300  |                                                   |
| C                     | -4.43924300 | 0.09650700  | -0.48864400 |                                                   |
| C                     | -4.15841500 | 1.49100600  | -0.98421400 |                                                   |
| C                     | -3.76104900 | 2.51708700  | -0.22568300 |                                                   |
| C                     | -3.49995600 | 3.87677300  | -0.81175800 |                                                   |
| C                     | -3.50291800 | 2.40490300  | 1.25109900  |                                                   |
| O                     | -4.62585400 | -2.60343200 | 0.25623200  |                                                   |
| H                     | 6.29746300  | -1.02024800 | -0.77879700 |                                                   |
| H                     | 4.21975800  | 2.41233500  | 0.77280200  |                                                   |
| H                     | 4.13487400  | -2.23640900 | -0.97149400 |                                                   |
| H                     | -0.09069800 | 1.37106400  | 0.96093300  |                                                   |
| H                     | 6.50314600  | 2.26157600  | 0.44295000  |                                                   |
| H                     | -1.75974700 | 0.75590200  | -0.48179200 |                                                   |
| H                     | -2.50852400 | -3.98071200 | 0.83067200  |                                                   |
| H                     | -0.20839000 | -3.07092900 | 0.76601300  |                                                   |
| H                     | -5.03031000 | -0.44673700 | -1.23109500 |                                                   |
| H                     | -5.06552900 | 0.12126400  | 0.41144800  |                                                   |
| H                     | -4.28585800 | 1.65867300  | -2.05083900 |                                                   |
| H                     | -3.67753100 | 3.89403200  | -1.88808500 |                                                   |
| H                     | -4.14117200 | 4.62689000  | -0.33813000 |                                                   |
| H                     | -2.46539600 | 4.18081100  | -0.62194200 |                                                   |
| H                     | -3.79600300 | 1.43967300  | 1.66495100  |                                                   |
| H                     | -2.43521900 | 2.55130100  | 1.45119900  |                                                   |
| H                     | -4.03549100 | 3.19383000  | 1.79096000  |                                                   |
| Neo-140* (P)          |             |             |             |                                                   |
| Cartesian Coordinates |             |             |             | Frequency and Energy                              |
| C                     | -5.39235300 | -0.48890800 | 0.50519200  | Zero-point Energy Correction = 0.323114 Hartree   |
| C                     | -5.39507600 | 0.82427300  | 0.00106300  | Thermal Correction to Energy = 0.344401 Hartree   |
| C                     | -4.21752400 | 1.43338300  | -0.40250500 | Thermal Correction to Enthalpy = 0.345345 Hartree |
| C                     | -3.03279100 | 0.71058400  | -0.29630900 | Thermal Correction to Free Energy = 0.270711      |
| C                     | -2.99423200 | -0.59097400 | 0.19646500  | Hartree                                           |
| C                     | -4.20641800 | -1.17686500 | 0.59850500  | EE + Zero-point Energy = -1072.7703 Hartree       |
| O                     | -1.89910800 | 1.34676900  | -0.70583900 | EE + Thermal Energy Correction = -1072.749        |
| C                     | -0.72762900 | 0.70520000  | -0.63261500 | Hartree                                           |
| C                     | -0.54550700 | -0.55463600 | -0.17055000 | EE + Thermal Enthalpy Correction = -1072.748      |
| C                     | -1.72048200 | -1.31857900 | 0.30026000  | Hartree                                           |
| O                     | -6.59070200 | 1.44698400  | -0.06647700 | EE + Thermal Free Energy Correction = -1072.8227  |
| O                     | -1.64839900 | -2.44694700 | 0.75663900  | Hartree                                           |



|                       |             |             |             |                                                   |
|-----------------------|-------------|-------------|-------------|---------------------------------------------------|
| C                     | 0.80641600  | -1.12647600 | -0.14735200 |                                                   |
| C                     | 1.91867700  | -0.30147400 | 0.14760800  |                                                   |
| C                     | 3.20457600  | -0.77700100 | 0.13564700  |                                                   |
| C                     | 3.44174900  | -2.18409500 | -0.20109700 |                                                   |
| C                     | 2.28122000  | -3.00687300 | -0.48707900 |                                                   |
| C                     | 1.01688900  | -2.49748900 | -0.45245200 |                                                   |
| C                     | 4.41723600  | 0.06607400  | 0.43941900  |                                                   |
| C                     | 4.13683800  | 1.44311000  | 0.97926300  |                                                   |
| C                     | 3.85432500  | 2.52810200  | 0.25255300  |                                                   |
| C                     | 3.61001300  | 3.86590100  | 0.89597000  |                                                   |
| C                     | 3.73733300  | 2.52001600  | -1.24708300 |                                                   |
| O                     | 4.59201900  | -2.65133000 | -0.23852700 |                                                   |
| H                     | -6.33141700 | -0.93237200 | 0.81201400  |                                                   |
| H                     | -4.19994700 | 2.44477100  | -0.79307900 |                                                   |
| H                     | -4.18106700 | -2.18844900 | 0.98562300  |                                                   |
| H                     | 0.07702100  | 1.32013700  | -1.01704900 |                                                   |
| H                     | -6.48715300 | 2.33795100  | -0.42236600 |                                                   |
| H                     | 1.74512300  | 0.73358800  | 0.42142700  |                                                   |
| H                     | 2.46574900  | -4.04588400 | -0.73571400 |                                                   |
| H                     | 0.16610200  | -3.12792400 | -0.67205200 |                                                   |
| H                     | 5.03634300  | -0.48969600 | 1.14902100  |                                                   |
| H                     | 5.01966500  | 0.11634000  | -0.47471300 |                                                   |
| H                     | 4.16806300  | 1.54679400  | 2.06165500  |                                                   |
| H                     | 3.70916700  | 3.81767500  | 1.98149500  |                                                   |
| H                     | 4.31875200  | 4.60887800  | 0.51556900  |                                                   |
| H                     | 2.60736600  | 4.23401100  | 0.65373100  |                                                   |
| H                     | 3.88472000  | 1.53246800  | -1.68435800 |                                                   |
| H                     | 2.74676800  | 2.88025600  | -1.54621700 |                                                   |
| H                     | 4.46470500  | 3.20800400  | -1.69077000 |                                                   |
| Neo-17C* (W)          |             |             |             |                                                   |
| Cartesian Coordinates |             |             |             | Frequency and Energy                              |
| C                     | 5.82344400  | 0.23882300  | 0.88350400  | Zero-point Energy Correction = 0.321974 Hartree   |
| C                     | 5.94773100  | -0.93469900 | 0.11614100  | Thermal Correction to Energy = 0.343559 Hartree   |
| C                     | 4.85640000  | -1.47626000 | -0.54080400 | Thermal Correction to Enthalpy = 0.344503 Hartree |
| C                     | 3.63027300  | -0.82853400 | -0.42217100 | Thermal Correction to Free Energy = 0.269027      |
| C                     | 3.46871700  | 0.33491200  | 0.32989000  | Hartree                                           |
| C                     | 4.60002000  | 0.85529200  | 0.98478400  | EE + Zero-point Energy = -1072.7792 Hartree       |
| O                     | 2.58120400  | -1.39357300 | -1.08615200 | EE + Thermal Energy Correction = -1072.7576       |
| C                     | 1.37235700  | -0.80628200 | -1.01688800 | Hartree                                           |
| C                     | 1.08596500  | 0.31095100  | -0.31618700 | EE + Thermal Enthalpy Correction = -1072.7567     |
| C                     | 2.15482000  | 0.97086500  | 0.43681500  | Hartree                                           |
| O                     | 7.18095200  | -1.49942500 | 0.05755300  | EE + Thermal Free Energy Correction = -1072.8321  |
| O                     | 1.96873500  | 1.97833100  | 1.12283700  | Hartree                                           |
| C                     | -0.30033300 | 0.83377700  | -0.30207000 |                                                   |
| C                     | -1.37360600 | -0.02170200 | -0.09116000 |                                                   |
| C                     | -2.72059700 | 0.40733600  | -0.10606900 |                                                   |
| C                     | -2.93516100 | 1.78779300  | -0.33390800 |                                                   |

|                              |             |             |             |                                                   |
|------------------------------|-------------|-------------|-------------|---------------------------------------------------|
| C                            | -1.86675900 | 2.65368700  | -0.54324400 |                                                   |
| C                            | -0.55851200 | 2.19198300  | -0.53010100 |                                                   |
| C                            | -3.74059000 | -0.58536900 | 0.11881200  |                                                   |
| C                            | -5.13575600 | -0.44912400 | 0.13109900  |                                                   |
| C                            | -6.00119600 | -1.50082200 | 0.35365200  |                                                   |
| C                            | -7.48179500 | -1.28948400 | 0.34955400  |                                                   |
| C                            | -5.51585600 | -2.89855400 | 0.61064700  |                                                   |
| O                            | -4.21735600 | 2.25828600  | -0.33794300 |                                                   |
| H                            | 6.69941900  | 0.63405600  | 1.38266300  |                                                   |
| H                            | 4.94155100  | -2.37954600 | -1.13346600 |                                                   |
| H                            | 4.48832400  | 1.75793800  | 1.57309500  |                                                   |
| H                            | 0.64137500  | -1.34571100 | -1.60624400 |                                                   |
| H                            | 7.16276200  | -2.29869900 | -0.48568900 |                                                   |
| H                            | -1.18189200 | -1.07235500 | 0.10432700  |                                                   |
| H                            | -2.07666600 | 3.70374500  | -0.72145500 |                                                   |
| H                            | 0.25685000  | 2.88186000  | -0.70828700 |                                                   |
| H                            | -3.34358000 | -1.58150900 | 0.29277900  |                                                   |
| H                            | -5.57631300 | 0.52373700  | -0.04394900 |                                                   |
| H                            | -7.74519500 | -0.24872700 | 0.15603700  |                                                   |
| H                            | -7.95724100 | -1.91981900 | -0.41087200 |                                                   |
| H                            | -7.91515300 | -1.58914700 | 1.31082400  |                                                   |
| H                            | -4.88859300 | -2.94502500 | 1.50706400  |                                                   |
| H                            | -6.35474000 | -3.58155100 | 0.74962500  |                                                   |
| H                            | -4.90893100 | -3.27106500 | -0.22105200 |                                                   |
| H                            | -4.20765900 | 3.21535600  | -0.46954600 |                                                   |
| <b>Neo-17C* (P)</b>          |             |             |             |                                                   |
| <b>Cartesian Coordinates</b> |             |             |             | <b>Frequency and Energy</b>                       |
| C                            | 5.82731100  | 0.22630800  | 0.89004100  | Zero-point Energy Correction = 0.322746 Hartree   |
| C                            | 5.94944500  | -0.94675900 | 0.12334100  | Thermal Correction to Energy = 0.344293 Hartree   |
| C                            | 4.85606300  | -1.48059800 | -0.53802500 | Thermal Correction to Enthalpy = 0.345237 Hartree |
| C                            | 3.62939400  | -0.82860000 | -0.42373600 | Thermal Correction to Free Energy = 0.270398      |
| C                            | 3.47521400  | 0.33568000  | 0.32582700  | Hartree                                           |
| C                            | 4.60593600  | 0.84933400  | 0.98324700  | EE + Zero-point Energy = -1072.7794 Hartree       |
| O                            | 2.58420000  | -1.38796300 | -1.08855600 | EE + Thermal Energy Correction = -1072.7579       |
| C                            | 1.37618600  | -0.79878600 | -1.01525600 | Hartree                                           |
| C                            | 1.08651700  | 0.31615200  | -0.31588000 | EE + Thermal Enthalpy Correction = -1072.7569     |
| C                            | 2.16353100  | 0.99549500  | 0.42647200  | Hartree                                           |
| O                            | 7.17509400  | -1.51366500 | 0.06995700  | EE + Thermal Free Energy Correction = -1072.8318  |
| O                            | 1.99211400  | 2.01303300  | 1.07854400  | Hartree                                           |
| C                            | -0.30064800 | 0.83434600  | -0.29658800 |                                                   |
| C                            | -1.37432800 | -0.02546200 | -0.10432000 |                                                   |
| C                            | -2.72191600 | 0.39849400  | -0.11860500 |                                                   |
| C                            | -2.94010700 | 1.77998000  | -0.33564500 |                                                   |
| C                            | -1.87113800 | 2.65172300  | -0.51438700 |                                                   |
| C                            | -0.56109600 | 2.19594900  | -0.49473500 |                                                   |
| C                            | -3.74200300 | -0.59473500 | 0.10125200  |                                                   |
| C                            | -5.13557000 | -0.45203900 | 0.13026200  |                                                   |

|                         |             |             |             |                                                   |
|-------------------------|-------------|-------------|-------------|---------------------------------------------------|
| C                       | -6.00639900 | -1.49644800 | 0.36125600  |                                                   |
| C                       | -7.48636300 | -1.27497000 | 0.36705100  |                                                   |
| C                       | -5.53068000 | -2.89967700 | 0.61106700  |                                                   |
| O                       | -4.21975800 | 2.23918200  | -0.35698300 |                                                   |
| H                       | 6.70364900  | 0.61571600  | 1.39313100  |                                                   |
| H                       | 4.93253900  | -2.38296500 | -1.13452700 |                                                   |
| H                       | 4.48802600  | 1.75378100  | 1.56812500  |                                                   |
| H                       | 0.64428700  | -1.33559900 | -1.60639000 |                                                   |
| H                       | 7.15376100  | -2.30726100 | -0.47836500 |                                                   |
| H                       | -1.18097000 | -1.07703700 | 0.08536800  |                                                   |
| H                       | -2.07458800 | 3.70701100  | -0.67187800 |                                                   |
| H                       | 0.25463600  | 2.89306800  | -0.63487100 |                                                   |
| H                       | -3.34638800 | -1.59303300 | 0.26605400  |                                                   |
| H                       | -5.56554100 | 0.52654300  | -0.03784300 |                                                   |
| H                       | -7.74403600 | -0.23376700 | 0.16718400  |                                                   |
| H                       | -7.97450600 | -1.90538000 | -0.38583700 |                                                   |
| H                       | -7.91642400 | -1.56086000 | 1.33438300  |                                                   |
| H                       | -4.83388400 | -2.94495900 | 1.45429300  |                                                   |
| H                       | -6.36918300 | -3.56202800 | 0.83204700  |                                                   |
| H                       | -5.00565800 | -3.30476000 | -0.26124400 |                                                   |
| H                       | -4.21500300 | 3.19452500  | -0.48915600 |                                                   |
| Neo-8O <sup>-</sup> (W) |             |             |             |                                                   |
| Cartesian Coordinates   |             |             |             | Frequency and Energy                              |
| C                       | -5.39143100 | -0.50772200 | 0.67684300  | Zero-point Energy Correction = 0.322305 Hartree   |
| C                       | -5.52217600 | 0.77037400  | 0.01915100  | Thermal Correction to Energy = 0.34343 Hartree    |
| C                       | -4.33059300 | 1.32837800  | -0.51695600 | Thermal Correction to Enthalpy = 0.344375 Hartree |
| C                       | -3.12913200 | 0.65746300  | -0.39637400 | Thermal Correction to Free Energy = 0.27099       |
| C                       | -3.00354300 | -0.58704900 | 0.24201000  | Hartree                                           |
| C                       | -4.18683900 | -1.14638300 | 0.77980700  | EE + Zero-point Energy = -1072.9491 Hartree       |
| O                       | -2.02679400 | 1.27176100  | -0.93987200 | EE + Thermal Energy Correction = -1072.928        |
| C                       | -0.82886100 | 0.66271700  | -0.86005100 | Hartree                                           |
| C                       | -0.59663300 | -0.52574500 | -0.26719700 | EE + Thermal Enthalpy Correction = -1072.927      |
| C                       | -1.71985100 | -1.24306900 | 0.35188300  | Hartree                                           |
| O                       | -6.65630800 | 1.35935200  | -0.06956200 | EE + Thermal Free Energy Correction = -1073.0004  |
| O                       | -1.56549400 | -2.32704900 | 0.93879100  | Hartree                                           |
| C                       | 0.78154800  | -1.06806300 | -0.22584000 |                                                   |
| C                       | 1.85219100  | -0.24703200 | 0.14682900  |                                                   |
| C                       | 3.16618300  | -0.70436000 | 0.16516000  |                                                   |
| C                       | 3.39548700  | -2.03674400 | -0.20034100 |                                                   |
| C                       | 2.34783000  | -2.87436300 | -0.56866300 |                                                   |
| C                       | 1.04494400  | -2.39181000 | -0.58120600 |                                                   |
| C                       | 4.35440800  | 0.16145100  | 0.54420400  |                                                   |
| C                       | 4.02107400  | 1.54020700  | 1.05322100  |                                                   |
| C                       | 3.64374200  | 2.57632000  | 0.29820300  |                                                   |
| C                       | 3.32877700  | 3.91836800  | 0.89886400  |                                                   |
| C                       | 3.45895200  | 2.49128300  | -1.19149900 |                                                   |
| O                       | 4.69540600  | -2.47542700 | -0.17688500 |                                                   |

|                          |             |             |             |                                                          |
|--------------------------|-------------|-------------|-------------|----------------------------------------------------------|
| H                        | -6.28947800 | -0.95127100 | 1.09338600  |                                                          |
| H                        | -4.36118800 | 2.28682500  | -1.02214200 |                                                          |
| H                        | -4.11626700 | -2.10566500 | 1.28056100  |                                                          |
| H                        | -0.05713900 | 1.25006600  | -1.34329600 |                                                          |
| H                        | 1.65169900  | 0.77729300  | 0.44199700  |                                                          |
| H                        | 2.56152200  | -3.90082400 | -0.84893900 |                                                          |
| H                        | 0.23552000  | -3.04565400 | -0.88219800 |                                                          |
| H                        | 4.93362500  | -0.37023600 | 1.30365100  |                                                          |
| H                        | 5.01102600  | 0.22591600  | -0.33082400 |                                                          |
| H                        | 4.08834100  | 1.68807300  | 2.12858100  |                                                          |
| H                        | 3.45742200  | 3.91640300  | 1.98235200  |                                                          |
| H                        | 3.97523200  | 4.69107900  | 0.47066400  |                                                          |
| H                        | 2.29780600  | 4.20667400  | 0.66896800  |                                                          |
| H                        | 3.77760700  | 1.53518300  | -1.60755300 |                                                          |
| H                        | 2.40131400  | 2.63503600  | -1.44065300 |                                                          |
| H                        | 4.01178800  | 3.29289500  | -1.69109200 |                                                          |
| H                        | 4.73023300  | -3.40622300 | -0.43151700 |                                                          |
| Neo-14O <sup>-</sup> (W) |             |             |             |                                                          |
| Cartesian Coordinates    |             |             |             | Frequency and Energy                                     |
| C                        | -5.31975300 | 0.27470400  | 1.29108600  | Zero-point Energy Correction = 0.322466 Hartree          |
| C                        | -5.64648900 | 0.71382200  | -0.00594300 | Thermal Correction to Energy = 0.343523 Hartree          |
| C                        | -4.70088500 | 0.72014300  | -1.01562600 | Thermal Correction to Enthalpy = 0.344467 Hartree        |
| C                        | -3.41668400 | 0.27102700  | -0.71793800 | Thermal Correction to Free Energy = 0.270645 Hartree     |
| C                        | -3.05801700 | -0.17865700 | 0.55278300  |                                                          |
| C                        | -4.04424600 | -0.16098600 | 1.55673600  | EE + Zero-point Energy = -1072.9396 Hartree              |
| O                        | -2.51796600 | 0.28843100  | -1.74026500 | EE + Thermal Energy Correction = -1072.9185 Hartree      |
| C                        | -1.26552600 | -0.16314800 | -1.51686900 |                                                          |
| C                        | -0.78994100 | -0.61338400 | -0.33548700 | EE + Thermal Enthalpy Correction = -1072.9176 Hartree    |
| C                        | -1.69332500 | -0.63796600 | 0.81853800  |                                                          |
| O                        | -6.92520900 | 1.12485400  | -0.21062500 | EE + Thermal Free Energy Correction = -1072.9914 Hartree |
| O                        | -1.33850400 | -1.00506000 | 1.94205700  |                                                          |
| C                        | 0.62263000  | -1.03879000 | -0.22523400 |                                                          |
| C                        | 1.65203200  | -0.26004700 | -0.77450700 |                                                          |
| C                        | 2.98449500  | -0.65039800 | -0.74530900 |                                                          |
| C                        | 3.35755100  | -1.89499500 | -0.14507900 |                                                          |
| C                        | 2.30127400  | -2.66654900 | 0.41183000  |                                                          |
| C                        | 0.97911400  | -2.25062600 | 0.37748900  |                                                          |
| C                        | 4.06179800  | 0.24505800  | -1.32004700 |                                                          |
| C                        | 4.91305400  | 0.89301400  | -0.24953500 |                                                          |
| C                        | 4.63596200  | 2.03178600  | 0.39487200  |                                                          |
| C                        | 5.54384900  | 2.56388800  | 1.47114400  |                                                          |
| C                        | 3.41032200  | 2.86803300  | 0.14576700  |                                                          |
| O                        | 4.59307800  | -2.30111800 | -0.11321100 |                                                          |
| H                        | -6.08527400 | 0.28633400  | 2.05706000  |                                                          |
| H                        | -4.94121100 | 1.05827200  | -2.01686000 |                                                          |
| H                        | -3.77832200 | -0.50331600 | 2.54947000  |                                                          |
| H                        | -0.67224400 | -0.12013600 | -2.42138400 |                                                          |

|   |             |             |             |
|---|-------------|-------------|-------------|
| H | -7.05174500 | 1.38659900  | -1.13262800 |
| H | 1.40005700  | 0.69247200  | -1.23564100 |
| H | 2.55789200  | -3.61619600 | 0.87185500  |
| H | 0.20920200  | -2.88333900 | 0.80698000  |
| H | 4.71330100  | -0.34857800 | -1.96814200 |
| H | 3.59028100  | 1.00604800  | -1.94565900 |
| H | 5.81501700  | 0.35604900  | 0.03617400  |
| H | 6.40119900  | 1.90959800  | 1.63726800  |
| H | 5.91086400  | 3.56097500  | 1.20665200  |
| H | 4.99797000  | 2.66952700  | 2.41462000  |
| H | 2.83791400  | 2.54430400  | -0.72267600 |
| H | 2.75021700  | 2.83184400  | 1.01950100  |
| H | 3.69040500  | 3.91712800  | 0.00774100  |

**Table S3.** The cartesian coordinates and energies of the TSs of the reaction between **Neo** and **HOO\*** and **NO<sub>2</sub>** calculated at M06-2X/6-311++G(d,p) level.

| Neo + HOO (RAF-W)     |             |             |             |                                                          |
|-----------------------|-------------|-------------|-------------|----------------------------------------------------------|
| Cartesian Coordinates |             |             |             | Frequency and Energy                                     |
| C                     | 5.22300100  | -0.74220700 | 0.67451900  | Zero-point Energy Correction = 0.351607 Hartree          |
| C                     | 5.35093100  | 0.35730800  | -0.19365200 | Thermal Correction to Energy = 0.375932 Hartree          |
| C                     | 4.24902600  | 0.87986700  | -0.85216900 | Thermal Correction to Enthalpy = 0.376876 Hartree        |
| C                     | 3.01178100  | 0.28853600  | -0.63095500 | Thermal Correction to Free Energy = 0.296031 Hartree     |
| C                     | 2.84582700  | -0.80705500 | 0.21600000  |                                                          |
| C                     | 3.98600500  | -1.30804500 | 0.86988600  | EE + Zero-point Energy = -1224.2753 Hartree              |
| O                     | 1.95499100  | 0.83195500  | -1.30726200 | EE + Thermal Energy Correction = -1224.251 Hartree       |
| C                     | 0.71318600  | 0.39308400  | -1.04671400 | EE + Thermal Enthalpy Correction = -1224.2501 Hartree    |
| C                     | 0.43737500  | -0.78545200 | -0.34601200 |                                                          |
| C                     | 1.52590600  | -1.41139900 | 0.40644300  | EE + Thermal Free Energy Correction = -1224.3309 Hartree |
| O                     | 6.59498100  | 0.87546800  | -0.34649400 |                                                          |
| O                     | 1.35448300  | -2.37128200 | 1.16204100  |                                                          |
| C                     | -0.94300500 | -1.26027000 | -0.27724200 |                                                          |
| C                     | -2.00812500 | -0.34647100 | -0.38931200 |                                                          |
| C                     | -3.33444900 | -0.74340700 | -0.34956600 |                                                          |
| C                     | -3.60154800 | -2.11450500 | -0.20809900 |                                                          |
| C                     | -2.56887100 | -3.04330800 | -0.10724700 |                                                          |
| C                     | -1.24834500 | -2.62160500 | -0.13177900 |                                                          |
| C                     | -4.50078600 | 0.22552700  | -0.41714100 |                                                          |
| C                     | -4.12551200 | 1.66827300  | -0.63853900 |                                                          |
| C                     | -3.60929600 | 2.48324700  | 0.28662000  |                                                          |
| C                     | -3.24003100 | 3.90595000  | -0.03005500 |                                                          |
| C                     | -3.30756000 | 2.05154500  | 1.69487200  |                                                          |
| O                     | -4.91270000 | -2.48805400 | -0.17036000 |                                                          |
| H                     | 6.10558500  | -1.12349100 | 1.17262500  |                                                          |
| H                     | 4.33685100  | 1.73065300  | -1.51769800 |                                                          |
| H                     | 3.87099400  | -2.15704900 | 1.53260000  |                                                          |
| H                     | 6.57810900  | 1.62692600  | -0.95450800 |                                                          |
| H                     | -1.80010400 | 0.71246800  | -0.48281000 |                                                          |
| H                     | -2.81006100 | -4.09657800 | -0.00890300 |                                                          |
| H                     | -0.45635800 | -3.35392000 | -0.06274100 |                                                          |
| H                     | -5.16956300 | -0.10180800 | -1.21757200 |                                                          |
| H                     | -5.07640800 | 0.11577700  | 0.50867600  |                                                          |
| H                     | -4.27307000 | 2.05933900  | -1.64245200 |                                                          |
| H                     | -3.46056200 | 4.15997600  | -1.06800500 |                                                          |
| H                     | -3.78069700 | 4.59796000  | 0.62340000  |                                                          |
| H                     | -2.17230100 | 4.06886300  | 0.15145600  |                                                          |
| H                     | -3.67077700 | 1.04888900  | 1.92195500  |                                                          |
| H                     | -2.22423800 | 2.06669400  | 1.86024900  |                                                          |
| H                     | -3.74632400 | 2.75386000  | 2.41037000  |                                                          |
| H                     | -4.98081300 | -3.44645600 | -0.07006500 |                                                          |
| H                     | 0.00310300  | 0.81004900  | -1.74677400 |                                                          |
| O                     | 0.18671100  | 1.64882700  | 0.39151600  |                                                          |

|                       |             |             |             |                                                          |
|-----------------------|-------------|-------------|-------------|----------------------------------------------------------|
| O                     | 1.34030200  | 2.07632900  | 0.97582800  |                                                          |
| H                     | 1.44342100  | 1.52421400  | 1.76889600  |                                                          |
| Neo + HOO (RAF-PE)    |             |             |             |                                                          |
| Cartesian Coordinates |             |             |             | Frequency and Energy                                     |
| C                     | 5.25912500  | -0.73728300 | 0.59070000  | Zero-point Energy Correction = 0.352667 Hartree          |
| C                     | 5.35594700  | 0.41375800  | -0.21139000 | Thermal Correction to Energy = 0.376937 Hartree          |
| C                     | 4.23325600  | 0.95553000  | -0.81737100 | Thermal Correction to Enthalpy = 0.377881 Hartree        |
| C                     | 3.00553600  | 0.33502200  | -0.61004300 | Thermal Correction to Free Energy = 0.297298 Hartree     |
| C                     | 2.87460200  | -0.81077800 | 0.17143500  |                                                          |
| C                     | 4.03312400  | -1.33250200 | 0.77170200  | EE + Zero-point Energy = -1224.2711 Hartree              |
| O                     | 1.93430400  | 0.89376000  | -1.23615100 | EE + Thermal Energy Correction = -1224.2468 Hartree      |
| C                     | 0.70326000  | 0.43505800  | -0.96385900 | EE + Thermal Enthalpy Correction = -1224.2459 Hartree    |
| C                     | 0.44691400  | -0.78107200 | -0.32339500 |                                                          |
| C                     | 1.56498500  | -1.45861200 | 0.34915600  | EE + Thermal Free Energy Correction = -1224.3264 Hartree |
| O                     | 6.58485800  | 0.95587000  | -0.35368400 |                                                          |
| O                     | 1.43673700  | -2.47702900 | 1.01624800  |                                                          |
| C                     | -0.93049000 | -1.26505600 | -0.24898800 |                                                          |
| C                     | -2.00726400 | -0.36091900 | -0.34157800 |                                                          |
| C                     | -3.32917500 | -0.77244800 | -0.31330100 |                                                          |
| C                     | -3.58393100 | -2.14810200 | -0.18991000 |                                                          |
| C                     | -2.54029500 | -3.06408600 | -0.09807000 |                                                          |
| C                     | -1.22365500 | -2.62997900 | -0.11889600 |                                                          |
| C                     | -4.50884000 | 0.18145900  | -0.37011900 |                                                          |
| C                     | -4.16816200 | 1.62057900  | -0.65954800 |                                                          |
| C                     | -3.66895000 | 2.49500100  | 0.21912900  |                                                          |
| C                     | -3.36058800 | 3.91523500  | -0.16851600 |                                                          |
| C                     | -3.33229800 | 2.14097500  | 1.64137300  |                                                          |
| O                     | -4.88561700 | -2.53196800 | -0.15790500 |                                                          |
| H                     | 6.15668800  | -1.13400300 | 1.04839600  |                                                          |
| H                     | 4.28751800  | 1.84638300  | -1.43301500 |                                                          |
| H                     | 3.93454800  | -2.22350900 | 1.38021300  |                                                          |
| H                     | 6.54309600  | 1.73770200  | -0.91775300 |                                                          |
| H                     | -1.81299500 | 0.70297400  | -0.40619000 |                                                          |
| H                     | -2.76235200 | -4.12295900 | -0.00675800 |                                                          |
| H                     | -0.42418300 | -3.35251400 | -0.04507500 |                                                          |
| H                     | -5.20302500 | -0.18523000 | -1.13068700 |                                                          |
| H                     | -5.05160700 | 0.09771000  | 0.57810300  |                                                          |
| H                     | -4.34083700 | 1.96079200  | -1.67813700 |                                                          |
| H                     | -3.59633900 | 4.10998400  | -1.21614100 |                                                          |
| H                     | -3.93041700 | 4.61491100  | 0.45179000  |                                                          |
| H                     | -2.30086900 | 4.13597200  | -0.00221600 |                                                          |
| H                     | -3.64878800 | 1.13503500  | 1.91832100  |                                                          |
| H                     | -2.24816300 | 2.20394900  | 1.78821500  |                                                          |
| H                     | -3.79057800 | 2.85507400  | 2.33305400  |                                                          |
| H                     | -4.94217400 | -3.49021800 | -0.06429500 |                                                          |
| H                     | -0.02410700 | 0.87730000  | -1.62981500 |                                                          |
| O                     | 0.18907800  | 1.62720300  | 0.51724200  |                                                          |
| O                     | 1.34335100  | 2.02576100  | 1.12063000  |                                                          |
| H                     | 1.39426900  | 1.49120000  | 1.92988400  |                                                          |

| Neo-8OH + HOO (FHT-W)  |             |             |             |                                                     |
|------------------------|-------------|-------------|-------------|-----------------------------------------------------|
| Cartesian Coordinates  |             |             |             | Frequency and Energy                                |
| C                      | 4.70259400  | -1.43059100 | -0.41433700 | Zero-point Energy Correction = 0.346097 Hartree     |
| C                      | 4.92591700  | -0.27063900 | 0.38070400  | Thermal Correction to Energy = 0.370475 Hartree     |
| C                      | 3.83390000  | 0.42483800  | 0.93435500  | Thermal Correction to Enthalpy = 0.371419 Hartree   |
| C                      | 2.54998000  | -0.04789100 | 0.69430400  | Thermal Correction to Free Energy = 0.289083        |
| C                      | 2.31982500  | -1.19290900 | -0.06632900 | Hartree                                             |
| C                      | 3.42669700  | -1.87803400 | -0.61797800 | EE + Zero-point Energy = -1224.2663 Hartree         |
| O                      | 1.52528900  | 0.66181600  | 1.24427500  | EE + Thermal Energy Correction = -1224.2419 Hartree |
| C                      | 0.26485300  | 0.23860100  | 1.05067400  | EE + Thermal Enthalpy Correction = -1224.241        |
| C                      | -0.09589900 | -0.84736600 | 0.33086800  | Hartree                                             |
| C                      | 0.94362600  | -1.65951300 | -0.29868200 | EE + Thermal Free Energy Correction = -1224.3233    |
| O                      | 6.15121300  | 0.15060800  | 0.60096300  | Hartree                                             |
| O                      | 0.70740000  | -2.65138400 | -0.98631600 |                                                     |
| C                      | -1.53020600 | -1.18049800 | 0.17236000  |                                                     |
| C                      | -2.45346600 | -0.17964100 | -0.15082400 |                                                     |
| C                      | -3.81422200 | -0.44046600 | -0.27022500 |                                                     |
| C                      | -4.24433300 | -1.75656800 | -0.05740900 |                                                     |
| C                      | -3.34404900 | -2.76937600 | 0.25622900  |                                                     |
| C                      | -1.98964600 | -2.48304500 | 0.36967300  |                                                     |
| C                      | -4.84893300 | 0.62181100  | -0.59345200 |                                                     |
| C                      | -4.30041300 | 1.97528900  | -0.96526500 |                                                     |
| C                      | -3.80782000 | 2.87598900  | -0.10986300 |                                                     |
| C                      | -3.28071200 | 4.20409600  | -0.57867400 |                                                     |
| C                      | -3.69704000 | 2.63922900  | 1.37076500  |                                                     |
| O                      | -5.58824400 | -1.99991500 | -0.17096600 |                                                     |
| H                      | 5.56130200  | -1.93954000 | -0.83414400 |                                                     |
| H                      | 3.99633000  | 1.30905700  | 1.54014900  |                                                     |
| H                      | 3.23565400  | -2.76411700 | -1.21090300 |                                                     |
| H                      | -0.44599300 | 0.88309500  | 1.55428500  |                                                     |
| H                      | -2.09721700 | 0.83063800  | -0.32234900 |                                                     |
| H                      | -3.71266500 | -3.77746500 | 0.41584800  |                                                     |
| H                      | -1.29643400 | -3.27413400 | 0.62825100  |                                                     |
| H                      | -5.47241800 | 0.25205900  | -1.41162400 |                                                     |
| H                      | -5.51919900 | 0.70433000  | 0.26981500  |                                                     |
| H                      | -4.30370400 | 2.22292200  | -2.02435600 |                                                     |
| H                      | -3.38509600 | 4.32216600  | -1.65855100 |                                                     |
| H                      | -3.81150400 | 5.02365400  | -0.08364800 |                                                     |
| H                      | -2.22290000 | 4.30934100  | -0.31594500 |                                                     |
| H                      | -4.13729200 | 1.69316900  | 1.68722500  |                                                     |
| H                      | -2.64152100 | 2.63955900  | 1.66631200  |                                                     |
| H                      | -4.17889700 | 3.45232100  | 1.92301500  |                                                     |
| H                      | -5.76556000 | -2.93272000 | 0.00523400  |                                                     |
| O                      | 6.24515500  | 2.08295600  | -0.73202900 |                                                     |
| H                      | 6.31559900  | 1.15005600  | 0.01772200  |                                                     |
| O                      | 4.96762000  | 2.03618900  | -1.19151300 |                                                     |
| H                      | 4.45012800  | 2.59355600  | -0.58302200 |                                                     |
| Neo-14OH + HOO (FHT-W) |             |             |             |                                                     |
| Cartesian Coordinates  |             |             |             | Frequency and Energy                                |



|                        |             |             |             |                                                     |
|------------------------|-------------|-------------|-------------|-----------------------------------------------------|
| C                      | -5.82441400 | 0.42602100  | 1.06238900  | Zero-point Energy Correction = 0.3468 Hartree       |
| C                      | -6.11366600 | 0.32768200  | -0.31106300 | Thermal Correction to Energy = 0.370926 Hartree     |
| C                      | -5.11344100 | 0.08157300  | -1.23692800 | Thermal Correction to Enthalpy = 0.37187 Hartree    |
| C                      | -3.81257400 | -0.07121800 | -0.76973300 | Thermal Correction to Free Energy = 0.290591        |
| C                      | -3.48841900 | 0.01493900  | 0.58397500  | Hartree                                             |
| C                      | -4.52937300 | 0.27174700  | 1.49392900  | EE + Zero-point Energy = -1224.2757 Hartree         |
| O                      | -2.85416800 | -0.31418200 | -1.71319200 | EE + Thermal Energy Correction = -1224.2515 Hartree |
| C                      | -1.58248100 | -0.48480500 | -1.32429000 | EE + Thermal Enthalpy Correction = -1224.2506       |
| C                      | -1.14516700 | -0.43092400 | -0.04611600 | Hartree                                             |
| C                      | -2.10448900 | -0.15367700 | 1.02698000  | EE + Thermal Free Energy Correction = -1224.3319    |
| O                      | -7.41071600 | 0.48475400  | -0.67699800 | Hartree                                             |
| O                      | -1.77499700 | -0.05013000 | 2.20922200  |                                                     |
| C                      | 0.28730500  | -0.63920200 | 0.24401600  |                                                     |
| C                      | 1.26431900  | -0.02384100 | -0.54759000 |                                                     |
| C                      | 2.61813900  | -0.22804700 | -0.32189800 |                                                     |
| C                      | 3.00144800  | -1.08633100 | 0.74489500  |                                                     |
| C                      | 2.01810600  | -1.71675700 | 1.53563600  |                                                     |
| C                      | 0.68186900  | -1.48527200 | 1.29903400  |                                                     |
| C                      | 3.67786600  | 0.45564600  | -1.14620800 |                                                     |
| C                      | 4.40304700  | 1.51325000  | -0.33933500 |                                                     |
| C                      | 3.96822100  | 2.75953000  | -0.12730000 |                                                     |
| C                      | 4.74735500  | 3.72318800  | 0.72524500  |                                                     |
| C                      | 2.67819900  | 3.30638600  | -0.67338500 |                                                     |
| O                      | 4.28852600  | -1.29030200 | 1.01001000  |                                                     |
| H                      | -6.63299100 | 0.61987100  | 1.75614400  |                                                     |
| H                      | -5.32712700 | 0.00701400  | -2.29685700 |                                                     |
| H                      | -4.29049900 | 0.34282200  | 2.54819300  |                                                     |
| H                      | -0.93737200 | -0.69213600 | -2.16940100 |                                                     |
| H                      | -7.50628400 | 0.38168900  | -1.63335400 |                                                     |
| H                      | 0.95976400  | 0.63810400  | -1.35196400 |                                                     |
| H                      | 2.34367500  | -2.37874800 | 2.32974100  |                                                     |
| H                      | -0.07010300 | -1.97334000 | 1.90581700  |                                                     |
| H                      | 4.39933600  | -0.29175200 | -1.48756900 |                                                     |
| H                      | 3.20749000  | 0.88835900  | -2.03057500 |                                                     |
| H                      | 5.33408700  | 1.20395800  | 0.12865600  |                                                     |
| H                      | 5.65747400  | 3.27047000  | 1.12154800  |                                                     |
| H                      | 5.01982200  | 4.61224600  | 0.14764800  |                                                     |
| H                      | 4.13412300  | 4.06761500  | 1.56464800  |                                                     |
| H                      | 2.84011800  | 4.30264200  | -1.09560300 |                                                     |
| H                      | 2.23405600  | 2.67271500  | -1.44053100 |                                                     |
| H                      | 1.94891000  | 3.42080900  | 0.13630800  |                                                     |
| H                      | 4.70245500  | -1.95435200 | 0.24179800  |                                                     |
| O                      | 4.82434500  | -2.82952100 | -0.71933200 |                                                     |
| O                      | 3.56308400  | -2.86707300 | -1.22052800 |                                                     |
| H                      | 3.10337300  | -3.56568500 | -0.72161800 |                                                     |
| Neo-17CH + HOO (FHT-W) |             |             |             |                                                     |
| Cartesian Coordinates  |             |             |             | Frequency and Energy                                |
| C                      | 2.54697300  | 1.63315400  | -0.18932500 | Zero-point Energy Correction = 0.346595 Hartree     |
| C                      | 1.50939800  | 2.54974900  | -0.33366400 | Thermal Correction to Energy = 0.37023 Hartree      |

|                                   |             |             |             |                                                     |
|-----------------------------------|-------------|-------------|-------------|-----------------------------------------------------|
| C                                 | 0.19116800  | 2.12821400  | -0.23572300 | Thermal Correction to Enthalpy = 0.371174 Hartree   |
| C                                 | -0.10886600 | 0.78513400  | 0.01726800  | Thermal Correction to Free Energy = 0.292311        |
| C                                 | 0.94416300  | -0.12000300 | 0.14673700  | Hartree                                             |
| C                                 | 2.28003100  | 0.27293300  | 0.03282800  | EE + Zero-point Energy = -1224.2763 Hartree         |
| O                                 | 3.85822300  | 2.02162600  | -0.21948000 | EE + Thermal Energy Correction = -1224.2527 Hartree |
| C                                 | 3.37822200  | -0.71770900 | 0.16746900  | EE + Thermal Enthalpy Correction = -1224.2518       |
| C                                 | 4.35864400  | -0.80989200 | -0.93963000 | Hartree                                             |
| C                                 | 5.33459200  | -1.73087500 | -1.02360300 | EE + Thermal Free Energy Correction = -1224.3306    |
| C                                 | 6.27324100  | -1.76555800 | -2.19411100 | Hartree                                             |
| C                                 | 5.58313800  | -2.77704300 | 0.02318000  |                                                     |
| H                                 | -0.60754600 | 2.85294700  | -0.33504700 |                                                     |
| H                                 | 4.02750200  | -0.33186400 | 1.13454300  |                                                     |
| H                                 | 4.28573600  | -0.06041300 | -1.72353500 |                                                     |
| H                                 | 6.20825100  | -2.73275100 | -2.70328100 |                                                     |
| H                                 | 6.05505100  | -0.97499800 | -2.91310900 |                                                     |
| H                                 | 7.30829200  | -1.65805500 | -1.85370000 |                                                     |
| H                                 | 6.60239500  | -2.67500400 | 0.40981800  |                                                     |
| H                                 | 4.89273000  | -2.71981200 | 0.86391700  |                                                     |
| H                                 | 1.74457800  | 3.59475000  | -0.50662000 |                                                     |
| H                                 | 3.91897200  | 2.96488300  | -0.42011800 |                                                     |
| H                                 | 0.73026900  | -1.17038100 | 0.31858100  |                                                     |
| C                                 | -1.51036300 | 0.33170900  | 0.17513100  |                                                     |
| C                                 | -2.55461800 | 0.73918400  | -0.76776800 |                                                     |
| C                                 | -1.83387100 | -0.49421000 | 1.19321400  |                                                     |
| C                                 | -3.88692800 | 0.20343900  | -0.48209100 |                                                     |
| O                                 | -2.33426900 | 1.46515400  | -1.73947400 |                                                     |
| O                                 | -3.05726000 | -1.00037100 | 1.42714100  |                                                     |
| H                                 | -1.12340700 | -0.83334700 | 1.93711700  |                                                     |
| C                                 | -4.08680300 | -0.65496000 | 0.60029100  |                                                     |
| C                                 | -4.99702600 | 0.51382300  | -1.28608700 |                                                     |
| C                                 | -5.32893200 | -1.20088900 | 0.90020100  |                                                     |
| C                                 | -6.23902700 | -0.00923800 | -1.01214000 |                                                     |
| H                                 | -4.85718100 | 1.17926800  | -2.12942500 |                                                     |
| C                                 | -6.40042000 | -0.87264900 | 0.08716200  |                                                     |
| H                                 | -5.44845000 | -1.86510300 | 1.74682500  |                                                     |
| H                                 | -7.09931900 | 0.23034400  | -1.62749300 |                                                     |
| O                                 | -7.60659600 | -1.41508100 | 0.39612000  |                                                     |
| H                                 | -8.27966300 | -1.11685800 | -0.22982900 |                                                     |
| H                                 | 3.00552900  | -1.68365900 | 0.51088000  |                                                     |
| O                                 | 4.72225400  | 0.23718700  | 2.15121000  |                                                     |
| O                                 | 3.95322900  | 1.28698600  | 2.57747900  |                                                     |
| H                                 | 4.12046800  | 1.98600300  | 1.92070200  |                                                     |
| H                                 | 5.51485300  | -3.77583800 | -0.42023200 |                                                     |
| Neo-8OH + NO <sub>2</sub> (FHT-W) |             |             |             |                                                     |
| Cartesian Coordinates             |             |             |             | Frequency and Energy                                |
| C                                 | 4.30997400  | -0.57404300 | 0.15493300  | Zero-point Energy Correction = 0.348828 Hartree     |
| C                                 | 4.35253200  | 0.79942000  | 0.60823400  | Thermal Correction to Energy = 0.373342 Hartree     |
| C                                 | 3.11967600  | 1.46658800  | 0.90636600  | Thermal Correction to Enthalpy = 0.374286 Hartree   |
| C                                 | 1.92935800  | 0.78945800  | 0.74769700  | Thermal Correction to Free Energy = 0.292485        |

|                                    |             |             |             |                                                     |
|------------------------------------|-------------|-------------|-------------|-----------------------------------------------------|
| C                                  | 1.90144900  | -0.53995200 | 0.30256200  | Hartree                                             |
| C                                  | 3.11295000  | -1.21268000 | 0.01032700  | EE + Zero-point Energy = -1270.9883 Hartree         |
| O                                  | 0.75000200  | 1.45961800  | 1.04356300  | EE + Thermal Energy Correction = -1270.9638 Hartree |
| C                                  | -0.45276400 | 0.80062900  | 0.86766100  | EE + Thermal Enthalpy Correction = -1270.9628       |
| C                                  | -0.57724300 | -0.46834200 | 0.41875500  | Hartree                                             |
| C                                  | 0.62197800  | -1.25942900 | 0.12825500  | EE + Thermal Free Energy Correction = -1271.0446    |
| O                                  | 5.47715600  | 1.42582800  | 0.74389800  | Hartree                                             |
| O                                  | 0.60800300  | -2.45086800 | -0.24116400 |                                                     |
| C                                  | -1.92395800 | -1.04747300 | 0.21913700  |                                                     |
| C                                  | -2.96977700 | -0.22865300 | -0.24266700 |                                                     |
| C                                  | -4.26578200 | -0.70993100 | -0.37721700 |                                                     |
| C                                  | -4.52348100 | -2.05371400 | -0.05803100 |                                                     |
| C                                  | -3.49245300 | -2.88608200 | 0.37278500  |                                                     |
| C                                  | -2.19707500 | -2.39048500 | 0.51170800  |                                                     |
| C                                  | -5.44087100 | 0.14557600  | -0.83864000 |                                                     |
| C                                  | -5.05781800 | 1.53902600  | -1.29153800 |                                                     |
| C                                  | -4.66734700 | 2.52523600  | -0.47721200 |                                                     |
| C                                  | -4.28073300 | 3.89261800  | -1.00186500 |                                                     |
| C                                  | -4.53050700 | 2.36694400  | 1.02260000  |                                                     |
| O                                  | -5.83706600 | -2.47565200 | -0.20698100 |                                                     |
| H                                  | 5.25418900  | -1.05774600 | -0.05876500 |                                                     |
| H                                  | 3.13401600  | 2.49244400  | 1.24769400  |                                                     |
| H                                  | 3.04970300  | -2.23923900 | -0.32780300 |                                                     |
| H                                  | -1.28445000 | 1.43525500  | 1.14429300  |                                                     |
| H                                  | -2.77005600 | 0.80320200  | -0.51189600 |                                                     |
| H                                  | -3.70586500 | -3.92392100 | 0.60505600  |                                                     |
| H                                  | -1.40231200 | -3.04340300 | 0.84307800  |                                                     |
| H                                  | -5.94656400 | -0.38317300 | -1.65397500 |                                                     |
| H                                  | -6.16039900 | 0.19406500  | -0.00913300 |                                                     |
| H                                  | -5.09346200 | 1.72627900  | -2.36255000 |                                                     |
| H                                  | -4.37300600 | 3.94379100  | -2.09088900 |                                                     |
| H                                  | -4.92004800 | 4.66529000  | -0.55632200 |                                                     |
| H                                  | -3.24455100 | 4.12651900  | -0.72495500 |                                                     |
| H                                  | -5.04301900 | 3.18797800  | 1.53889200  |                                                     |
| H                                  | -4.93254000 | 1.41585600  | 1.38189900  |                                                     |
| H                                  | -3.46824300 | 2.41584400  | 1.30160500  |                                                     |
| H                                  | -5.93674300 | -3.43537300 | 0.02728000  |                                                     |
| O                                  | 7.48580700  | -0.05350900 | 0.08030500  |                                                     |
| H                                  | 6.67560200  | 0.54340100  | 0.34757900  |                                                     |
| N                                  | 7.65702700  | 0.21878500  | -1.32296000 |                                                     |
| O                                  | 8.61108600  | -0.42127100 | -1.76755500 |                                                     |
| Neo-14OH + NO <sub>2</sub> (FHT-W) |             |             |             |                                                     |
| Cartesian Coordinates              |             |             |             | Frequency and Energy                                |
| C                                  | -5.94904300 | 0.55499000  | 0.88996000  | Zero-point Energy Correction = 0.343155 Hartree     |
| C                                  | -6.18622600 | 0.13249100  | -0.43024600 | Thermal Correction to Energy = 0.366935 Hartree     |
| C                                  | -5.14054800 | -0.26923500 | -1.24688100 | Thermal Correction to Enthalpy = 0.367879 Hartree   |
| C                                  | -3.85180000 | -0.24680800 | -0.72344900 | Thermal Correction to Free Energy = 0.287791        |
| C                                  | -3.58148900 | 0.16328100  | 0.57929200  | Hartree                                             |
| C                                  | -4.66434800 | 0.56741600  | 1.37821600  | EE + Zero-point Energy = -1278.4296 Hartree         |

|   |             |             |             |                                                     |
|---|-------------|-------------|-------------|-----------------------------------------------------|
| O | -2.85468400 | -0.65332900 | -1.56177200 | EE + Thermal Energy Correction = -1278.4058 Hartree |
| C | -1.59444300 | -0.66017700 | -1.12300900 | EE + Thermal Enthalpy Correction = -1278.4049       |
| C | -1.19433100 | -0.28662400 | 0.11603400  | Hartree                                             |
| C | -2.20364300 | 0.17338100  | 1.09162200  | EE + Thermal Free Energy Correction = -1278.485     |
| O | -7.46867700 | 0.14057800  | -0.84903300 | Hartree                                             |
| O | -1.92155900 | 0.54960100  | 2.21664900  |                                                     |
| C | 0.22952700  | -0.36436800 | 0.46148300  |                                                     |
| C | 1.20897700  | -0.02142600 | -0.47921100 |                                                     |
| C | 2.55928100  | -0.14834200 | -0.20755100 |                                                     |
| C | 2.94601700  | -0.69050300 | 1.07066100  |                                                     |
| C | 1.95447200  | -0.97857300 | 2.04336200  |                                                     |
| C | 0.62974700  | -0.81574100 | 1.74903900  |                                                     |
| C | 3.60776700  | 0.38306500  | -1.14939600 |                                                     |
| C | 4.25652400  | 1.61642700  | -0.55103300 |                                                     |
| C | 3.74120500  | 2.84957200  | -0.56672400 |                                                     |
| C | 4.45270900  | 3.99762500  | 0.09438700  |                                                     |
| C | 2.42363800  | 3.20427400  | -1.19817000 |                                                     |
| O | 4.20653300  | -0.88283700 | 1.37737000  |                                                     |
| H | -6.79052900 | 0.86166300  | 1.49886300  |                                                     |
| H | -5.30306200 | -0.59648000 | -2.26788200 |                                                     |
| H | -4.45960100 | 0.88849700  | 2.39267000  |                                                     |
| H | -0.91505100 | -1.03464900 | -1.87984200 |                                                     |
| H | -7.52927500 | -0.17262800 | -1.75980100 |                                                     |
| H | 0.90620400  | 0.39103800  | -1.43602300 |                                                     |
| H | 2.28284800  | -1.36024400 | 3.00246000  |                                                     |
| H | -0.12512100 | -1.06136700 | 2.48322900  |                                                     |
| H | 4.37610700  | -0.36978200 | -1.33496500 |                                                     |
| H | 3.13547600  | 0.60442600  | -2.10792900 |                                                     |
| H | 5.19895800  | 1.45504300  | -0.03548400 |                                                     |
| H | 5.37593900  | 3.67794900  | 0.57976100  |                                                     |
| H | 4.69246100  | 4.77383500  | -0.63959100 |                                                     |
| H | 3.80558200  | 4.46156400  | 0.84637900  |                                                     |
| H | 2.50966400  | 4.14286300  | -1.75337100 |                                                     |
| H | 2.05355600  | 2.43608700  | -1.87673900 |                                                     |
| H | 1.66668700  | 3.36171000  | -0.42125000 |                                                     |
| H | 4.63851600  | -1.49150300 | 0.64958000  |                                                     |
| O | 4.71141700  | -2.60469800 | -0.30696700 |                                                     |
| N | 3.48441200  | -2.78309500 | -0.49551500 |                                                     |
| O | 3.10519500  | -3.60565400 | -1.28397000 |                                                     |

**Table S4.** The method to calculate rate constant following the conventional transition state theory.

The antiradical action of phenolic compounds is well recognized to be directed by three distinct processes; HAT, SET, and RAF <sup>1-5</sup>. A hydrogen atom is transferred from the antioxidant to the free radical in a one-step process known as HAT. The BDE of the active OH/CH bonds of the antioxidant may be used to describe this mechanism, which may occur in both polar and lipid environments <sup>6</sup>. RAF is a one-step process that leads to the product [antioxidant–free radical]• by combining free radicals with antioxidants <sup>7</sup>. The Gibbs free energy of the reaction could be used to describe this mechanism. Unlike HAT and RAF, the SET process, which involves an electron transfer, could only occur in polar environments <sup>8</sup>. In these media, the phenolic OH bonds of the antioxidant could exist in both protonated and deprotonated forms and therefore electron transfer can occur from the neutral or anionic state of the antioxidant. However, SET from an undissociated phenol is often an infeasible chemical route, thus it is only significant for deprotonated phenols. The Gibbs free energy of electron transfer may be used to describe this pathway (dominant step). The following equations describe the mentioned mechanisms.

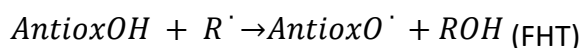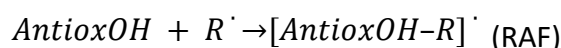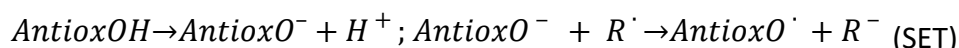

PA (proton affinity) and BDE (bond dissociation enthalpy) values were calculated as follows.

$$\text{BDE} = H(\text{ArO}^\cdot) + H(\text{H}^\cdot) - H(\text{ArOH})$$

$$\text{PA} = H(\text{ArO}^-) + H(\text{H}^+) - H(\text{ArOH})$$

Where  $H(\text{ArOH})$ ,  $H(\text{ArO}^\cdot)$ ,  $H(\text{ArO}^-)$ ,  $H(\text{H}^\cdot)$ , and  $H(\text{H}^+)$  are enthalpies of the neutral molecule, radical, anion, hydrogen atom, and proton respectively.

The pKa values of CBDA were computed according to the literature using the following equation <sup>9</sup>:

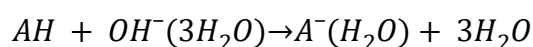

$$\text{pK}_a = \frac{\Delta G_{sol}}{RT \ln(10)} + 14 + 3 \log_{10} [\text{H}_2\text{O}]$$

Where  $\Delta G_{sol}$  is the Gibbs free energy of the reaction in solution, R is the gas constant, and T is the temperature (298.15 K).

The kinetic calculations were carried out following the methodology of the quantum mechanics-based test for overall free radical scavenging activity (QM-ORSA)<sup>10, 11</sup>. The rate constant ( $k$ ) was calculated by using standard transition state theory (TST) and 1M standard state at 298.15 K according to the equation below:<sup>12-19</sup>

$$k = \sigma \kappa \frac{k_B T}{h} e^{-(\Delta G^\ddagger)/RT}$$

Where  $\sigma$  is the reaction symmetry number,<sup>20, 21</sup>  $\kappa$  represents tunneling corrections computed using the Eckart barrier,<sup>22</sup>  $k_B$  is the Boltzmann constant,  $h$  is the Planck constant,  $\Delta G^\ddagger$  is Gibbs free energy of activation.

The apparent rate constants ( $k_{app}$ , rate constants close to the diffusion limit) were corrected using the Collins–Kimball theory<sup>23</sup>. Branching ratios ( $\Gamma$ , %) were calculated as follows:

$$\Gamma_{path} = \frac{k}{k_{overall}} \times 100$$

Where  $k$  and  $k_{overall}$  are the rate constants of a specific reaction path and the sum of the rate constants of all reaction paths, respectively.

Marcus theory has been used to predict the Gibbs free energy of activation of the single electron transfer mechanism<sup>24</sup>:

$$\Delta G_{SET}^\ddagger = \frac{\lambda}{4} \left( 1 + \frac{\Delta G_{SET}^0}{\lambda} \right)^2$$

$$\lambda \approx \Delta E_{SET} + \Delta G_{SET}^0$$

Where  $\lambda$  is the nuclear reorganization energy,  $\Delta G_{SET}^0$  is the Gibbs free energy of reaction, and  $\Delta E_{SET}$  is the nonadiabatic energy difference between reactants and vertical products. The computational kinetic study was performed with Eyringpy software<sup>17</sup>.

## References

1. Leopoldini, M.; Russo, N.; Toscano, M., The molecular basis of working mechanism of natural polyphenolic antioxidants. *Food Chemistry* **2011**, *125* (2), 288-306.
2. Galano, A.; Mazzone, G.; Alvarez-Diduk, R.; Marino, T.; Alvarez-Idaboy, J. R.; Russo, N., Food Antioxidants: Chemical Insights at the Molecular Level. *Annual Review of Food Science and Technology* **2016**, *7* (1), 335-352.
3. Litwinienko, G.; Ingold, K. U., Abnormal Solvent Effects on Hydrogen Atom Abstractions. 1. The Reactions of Phenols with 2,2-Diphenyl-1-picrylhydrazyl (dpph•) in Alcohols. *The Journal of Organic Chemistry* **2003**, *68* (9), 3433-3438.
4. Litwinienko, G.; Ingold, K. U., Abnormal Solvent Effects on Hydrogen Atom Abstraction. 2. Resolution of the Curcumin Antioxidant Controversy. The Role of Sequential Proton Loss Electron Transfer. *The Journal of Organic Chemistry* **2004**, *69* (18), 5888-5896.
5. Litwinienko, G.; Ingold, K. U., Abnormal Solvent Effects on Hydrogen Atom Abstraction. 3. Novel Kinetics in Sequential Proton Loss Electron Transfer Chemistry. *The Journal of Organic Chemistry* **2005**, *70* (22), 8982-8990.
6. Boulebd, H.; Mechler, A.; Hoa, N. T.; Vo, Q. V., Thermodynamic and kinetic studies of the antiradical activity of 5-hydroxymethylfurfural: computational insights. *New Journal of Chemistry* **2020**, *44* (23), 9863-9869.
7. Leopoldini, M.; Chiodo, S. G.; Russo, N.; Toscano, M., Detailed Investigation of the OH Radical Quenching by Natural Antioxidant Caffeic Acid Studied by Quantum Mechanical Models. *Journal of Chemical Theory and Computation* **2011**, *7* (12), 4218-4233.
8. Xue, Y.; Liu, Y.; Xie, Y.; Cong, C.; Wang, G.; An, L.; Teng, Y.; Chen, M.; Zhang, L., Antioxidant activity and mechanism of dihydrochalcone C-glycosides: Effects of C-glycosylation and hydroxyl groups. *Phytochemistry* **2020**, *179*, 112393.
9. Rebollar-Zepeda, A. M.; Campos-Hernández, T.; Ramírez-Silva, M. T.; Rojas-Hernández, A.; Galano, A., Searching for Computational Strategies to Accurately Predict pKas of Large Phenolic Derivatives. *Journal of Chemical Theory and Computation* **2011**, *7* (8), 2528-2538.
10. Galano, A.; Alvarez-Idaboy, J. R., A computational methodology for accurate predictions of rate constants in solution: Application to the assessment of primary antioxidant activity. *Journal of Computational Chemistry* **2013**, *34* (28), 2430-2445.
11. Galano, A.; Alvarez-Idaboy, J. R., Computational strategies for predicting free radical scavengers' protection against oxidative stress: Where are we and what might follow? *International Journal of Quantum Chemistry* **2019**, *119* (2), e25665.
12. Evans, M. G.; Polanyi, M., Some applications of the transition state method to the calculation of reaction velocities, especially in solution. *Transactions of the Faraday Society* **1935**, *31*, 875-894.
13. Eyring, H., The Activated Complex in Chemical Reactions. *Journal of Chemical Physics* **1935**, *3* (2), 107-115.
14. Truhlar, D. G.; Hase, W. L.; Hynes, J. T., Current Status of Transition-State Theory. *Journal of Physical Chemistry A* **1983**, *87* (15), 2664-2682.
15. Furuncuoglu, T.; Ugur, I.; Degirmenci, I.; Aviyente, V., Role of chain transfer agents in free radical polymerization kinetics. *Macromolecules* **2010**, *43* (4), 1823-1835.
16. Vélez, E.; Quijano, J.; Notario, R.; Pabón, E.; Murillo, J.; Leal, J.; Zapata, E.; Alarcón, G., A computational study of stereospecificity in the thermal elimination reaction of menthyl benzoate in the gas phase. *Journal of Physical Organic Chemistry* **2009**, *22* (10), 971-977.
17. Dzib, E.; Cabellos, J. L.; Ortíz - Chi, F.; Pan, S.; Galano, A.; Merino, G., Eyringpy: A program for computing rate constants in the gas phase and in solution. *International Journal of Quantum Chemistry* **2019**, *119* (2), e25686.
18. E. Dzib; J. L. Cabellos; F. Ortiz-Chi; S. Pan; A. Galano; G. Merino, *Eyringpy 1.0.2* **2018**, Cinvestav, Mérida, Yucatán.
19. Boulebd, H.; Amine Khodja, I.; Bay, M. V.; Hoa, N. T.; Mechler, A.; Vo, Q. V., Thermodynamic and Kinetic Studies of the Radical Scavenging Behavior of Hydralazine and Dihydralazine: Theoretical Insights. *Journal of Physical Chemistry B* **2020**, *124* (20), 4123-4131.
20. Pollak, E.; Pechukas, P., Symmetry numbers, not statistical factors, should be used in absolute rate theory and in Broensted relations. *Journal of the American Chemical Society* **1978**, *100* (10), 2984-2991.

21. Fernández-Ramos, A.; Ellingson, B. A.; Meana-Pañeda, R.; Marques, J. M.; Truhlar, D. G., Symmetry numbers and chemical reaction rates. *Theoretical Chemistry Accounts* **2007**, *118* (4), 813-826.
22. Eckart, C., The penetration of a potential barrier by electrons. *Physical Review* **1930**, *35* (11), 1303.
23. Collins, F. C.; Kimball, G. E., Diffusion-controlled reaction rates. *Journal of Colloid and Interface Science* **1949**, *4* (4), 425-437.
24. Corchado, J. C.; Coitino, E. L.; Chuang, Y.-Y.; Fast, P. L.; Truhlar, D. G., Interpolated variational transition-state theory by mapping. *Journal of Physical Chemistry A* **1998**, *102* (14), 2424-2438.
